# Supplementary material for: Mitochondria-enriched protrusions are associated with brain and intestinal stem cells in Drosophila
Source: PubMed Central journal article supplement (PMC6874589; doi:10.1038/s42003-019-0671-4), 2019-11-22
Supplement: 42003_2019_671_MOESM1_ESM.pdf [file 42003_2019_671_MOESM1_ESM.pdf]

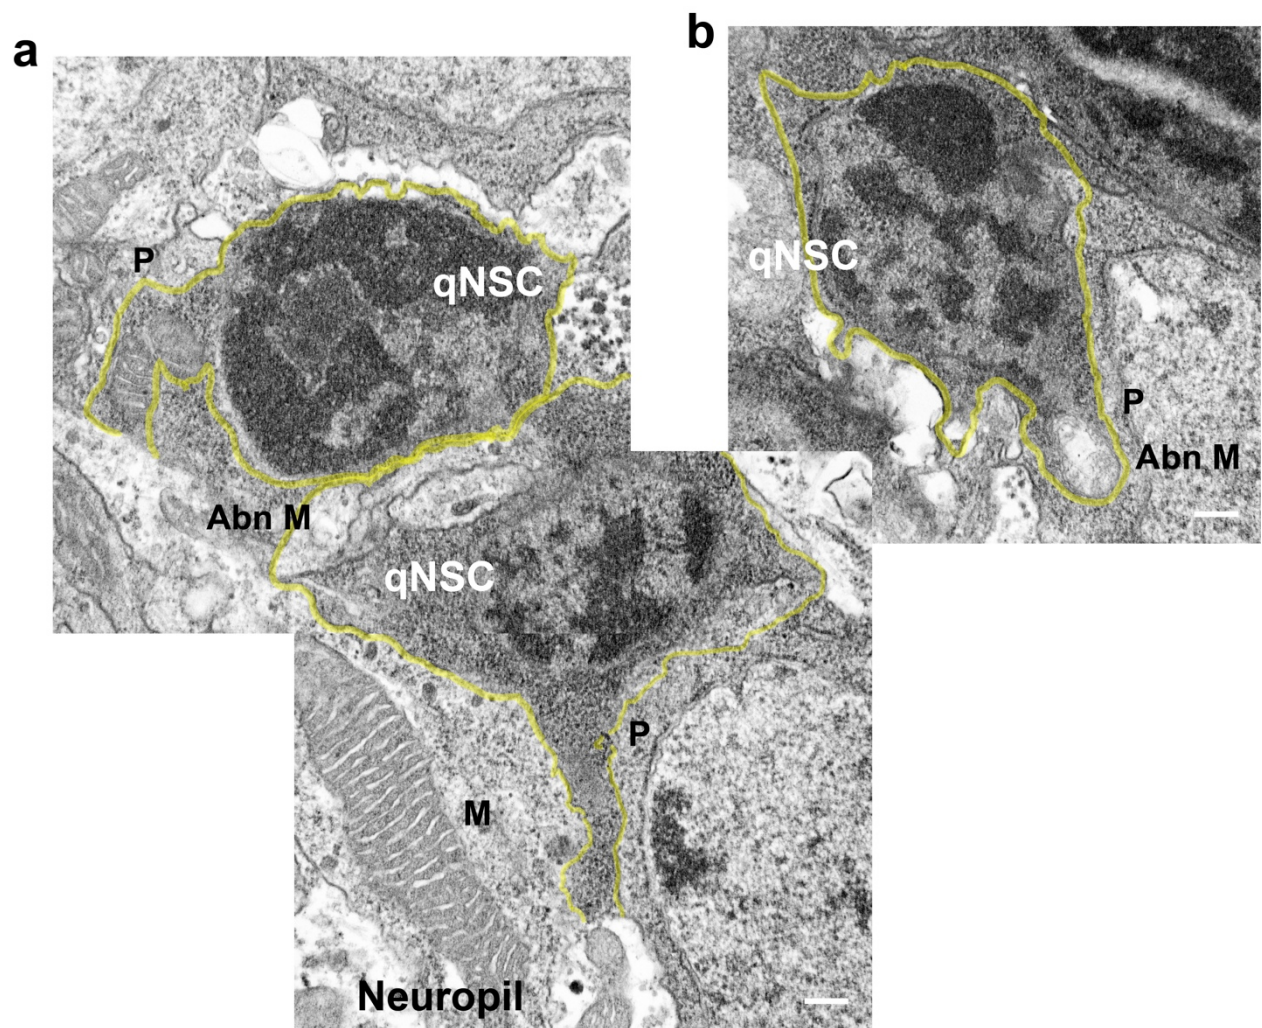

**Supplementary Figure 1** qNSCs contain abnormal mitochondria. **a** Mitochondria with distorted cristae (Abn M, abnormal mitochondria) in a qNSC cell body (see Fig. 1g). **b** Abnormal mitochondrion in a qNSC protrusion (P) with a vacuole and abnormal cristae. Bars, 200 nm.

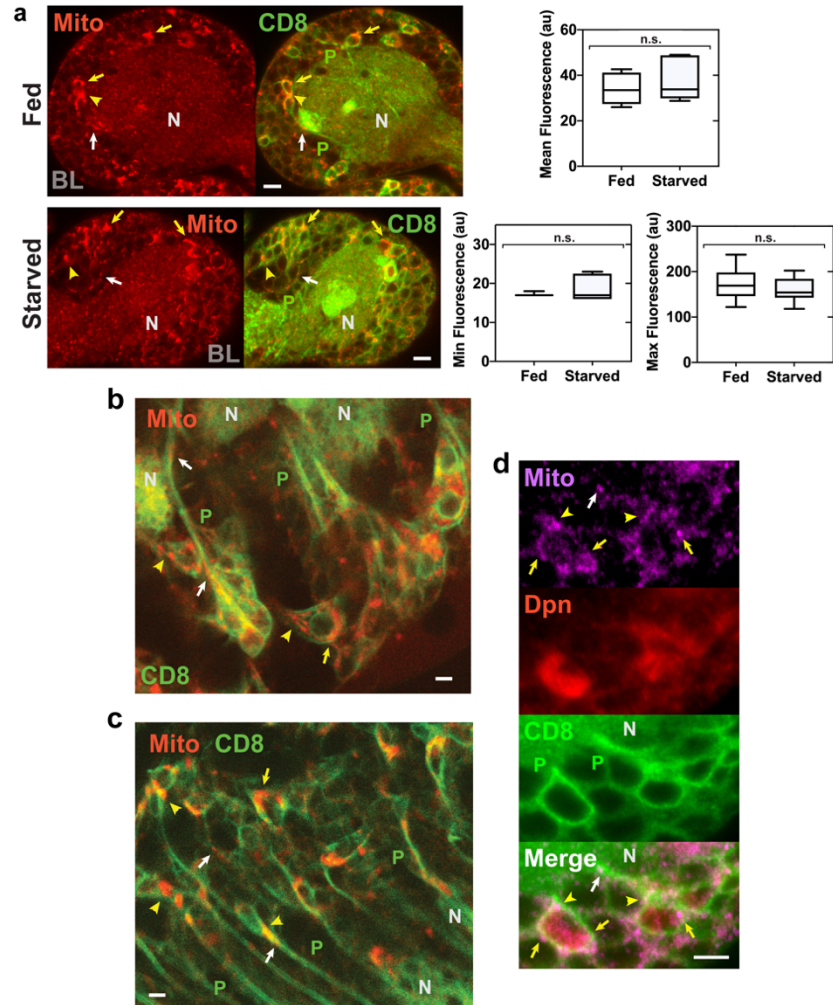

**Supplementary Figure 2** qNSC protrusions in both fed and starved larvae contain clustered mitochondria. **a** Mitochondria (Mito, mito-RFP, red) in fed (top) and starved (bottom) fixed larval BL z-sections showed no significant difference in mito-RFP mean intensity (representative images; plot, Mean Fluorescence, right; au, arbitrary units; n.s., not significant) or distribution (plots, Minimum, Min Fluorescence; Maximum, Max Fluorescence, right). Mean fluorescence: fed,  $34.0 \pm 2.1$  au, *mean*  $\pm$  *SEM*,  $n=9$  z-sections,  $n=3$  BLs; starved,  $37.5 \pm 2.9$  au,  $n=9$  z-sections,  $n=3$  BLs;  $P=0.35$ , unpaired  $t$  test. Minimum fluorescence: fed,  $17.1 \pm 0.1$  au,  $n=9$  z-sections,  $n=3$  BLs; starved,  $18.6 \pm 1.0$  au,  $n=9$  z-sections,  $n=3$  BLs;  $P=0.19$ , unpaired  $t$  test. Maximum fluorescence: fed,  $173.1 \pm 11.6$  au,  $n=9$  z-sections,  $n=3$  BLs; starved,  $160.2 \pm 8.8$  au,  $n=9$  z-sections,  $n=3$  BLs;  $P=0.39$ , unpaired  $t$  test. Mitochondria in NSC protrusions (white arrows), necks (yellow arrowheads) and cell bodies (yellow arrows). CD8, CD8 membrane protein (green); BL, brain lobe; N, neuropil; P, protrusion. Bars, 6  $\mu$ m. **b** Mito-RFP (red) in live BL NSCs and **c** live tvNC NSCs (fed larvae) (see Fig. 2c,e for higher magnification images). **d** Mitochondria in BL qNSCs immunostained for TOMM20 mitochondrial protein (Mito, purple; starved larva). IFM images showing all channels (see Fig. 2f right, for other overlays). Dpn (red), Deadpan. Bars (**b,c,d**), 3  $\mu$ m.



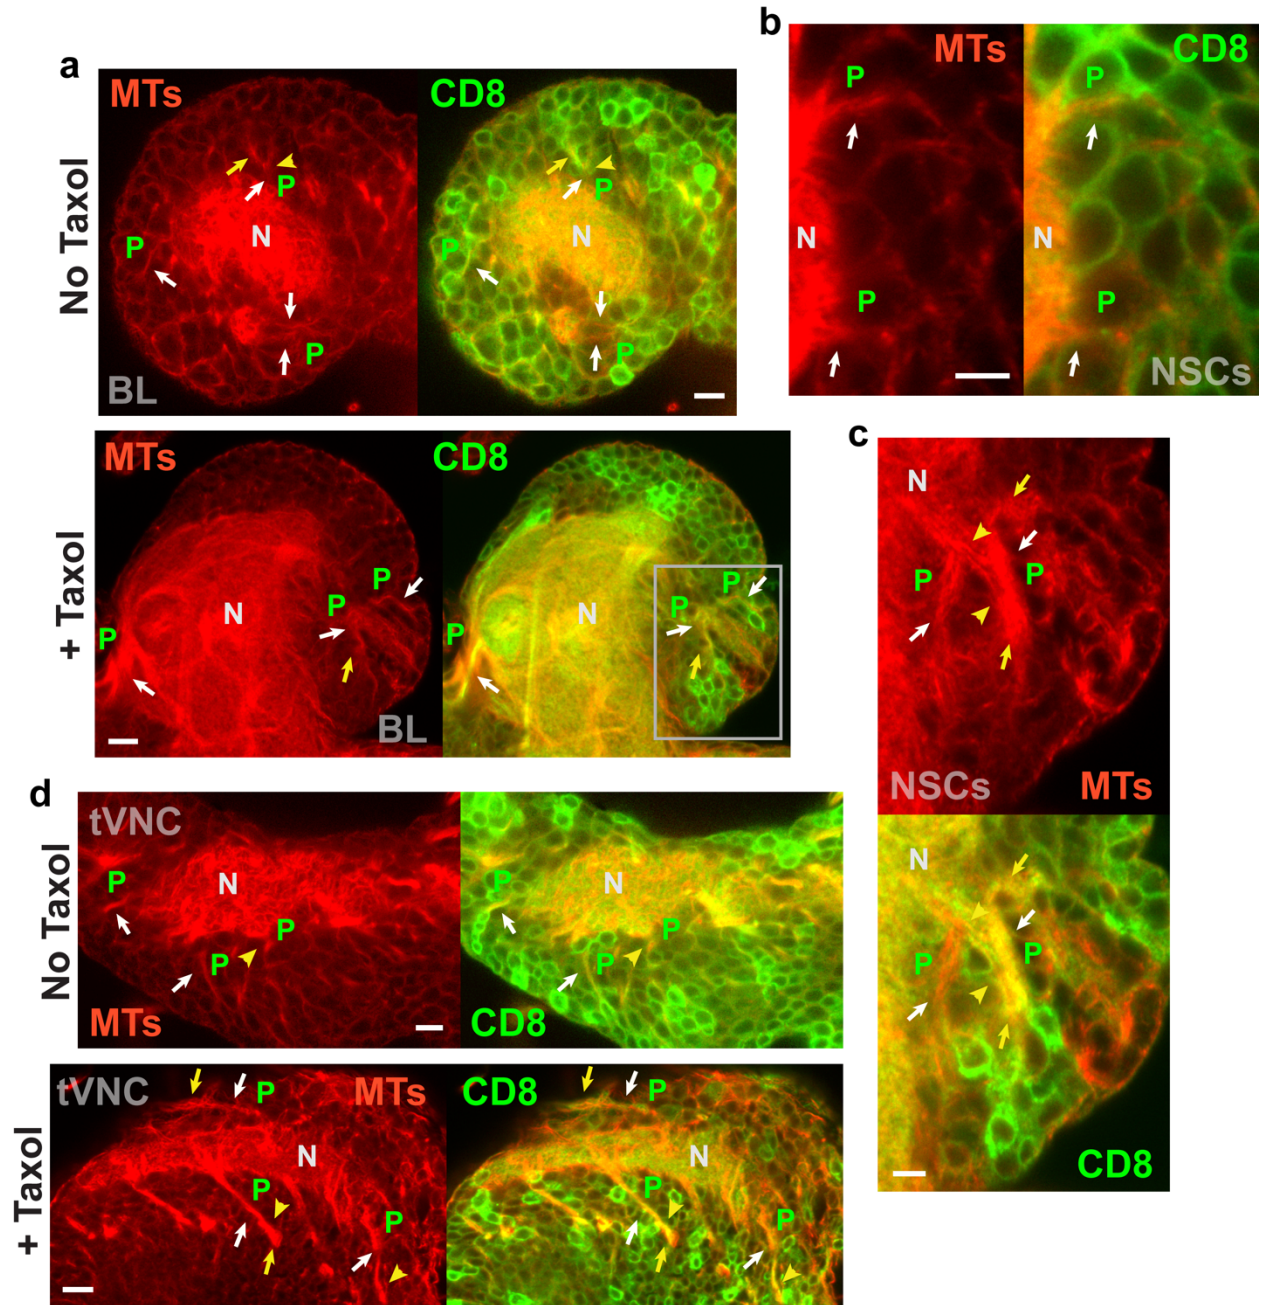

**Supplementary Figure 3** Taxol stabilizes and bundles microtubules in larval brains. **a** Microtubules (MTs, rhodamine-labeled  $\alpha$ Tub mAb, red) in a control (No Taxol, top) and Taxol-treated (+Tx, bottom) brain lobe (BL), and **b** control and **c** Taxol-treated neural stem cells (NSCs; **c** higher magnification image from **a**, inset, gray box, plane of focus in **c** differs slightly from boxed region) showing enhanced bundling after Taxol treatment. NSC protrusions (P, white arrows), necks (yellow arrowheads) and cell bodies (yellow arrows). N, neuropil. CD8, CD8 membrane protein (green). **d** Microtubules in a control (top) or Taxol-treated thoracic ventral nerve cord (tVNC; bottom); bundled microtubules in the neuropil extend into tVNC NSC protrusions, necks and cell bodies after Taxol treatment. Bars: 6  $\mu$ m (**a**, **d**); 3  $\mu$ m (**b**, **c**).

**Supplementary Table 1** qNSC-specific mitochondrial genes.

| No | Gene name | No | Gene name | No | Gene name | No | Gene name | No | Gene name |
|----|-----------|----|-----------|----|-----------|----|-----------|----|-----------|
| 1  | Hsc70-4   | 21 | Kaz1-ORFB | 41 | ND-ASHI   | 61 | kdn       | 81 | LysRS     |
| 2  | ND-MWFE   | 22 | GstZ1     | 42 | Gpo3      | 62 | CG3902    | 82 | Men-b     |
| 3  | CG11077   | 23 | ND-B14.5B | 43 | CG12118   | 63 | whd       | 83 | Hsp68     |
| 4  | CG3719    | 24 | ppl       | 44 | Hsc70-5   | 64 | mino      | 84 | Trxr-1    |
| 5  | mRpL55    | 25 | Coq4      | 45 | Menl-2    | 65 | Got1      |    |           |
| 6  | Tim8      | 26 | CG15093   | 46 | Menl-1    | 66 | ND-ACP    |    |           |
| 7  | CG17991   | 27 | Fis1      | 47 | Gpo1      | 67 | Oat       |    |           |
| 8  | arg       | 28 | ND-19     | 48 | Dhfr      | 68 | Pdk       |    |           |
| 9  | CG15390   | 29 | Etf-QO    | 49 | Adck      | 69 | Got2      |    |           |
| 10 | Nap1      | 30 | Mccc2     | 50 | Idh3a     | 70 | spoon     |    |           |
| 11 | ND-B15    | 31 | ND-B17.2  | 51 | CG4860    | 71 | Shmt      |    |           |
| 12 | Tom7      | 32 | Nmdmc     | 52 | Idh3b     | 72 | mRpS30    |    |           |
| 13 | CG32281   | 33 | ND-13B    | 53 | pr        | 73 | cav       |    |           |
| 14 | mRpL53    | 34 | CG14806   | 54 | pnut      | 74 | Aldh      |    |           |
| 15 | CG11752   | 35 | CG6638    | 55 | Nipsnap   | 75 | CysRS-m   |    |           |
| 16 | Gdh       | 36 | Pdha      | 56 | Baldspot  | 76 | Hsc70-1   |    |           |
| 17 | Adk2      | 37 | Dcp-1     | 57 | CG1640    | 77 | CG5214    |    |           |
| 18 | Chchd3    | 38 | Men       | 58 | muc       | 78 | zuc       |    |           |
| 19 | Sirup     | 39 | RFeSP     | 59 | slgA      | 79 | Gdap1     |    |           |
| 20 | Rpp20     | 40 | Ssadh     | 60 | larp      | 80 | CG7461    |    |           |

Annotated list of mitochondrial genes among genes expressed in *Drosophila* late embryo/early larval qNSCs identified in screen by Otsuki and Brand<sup>1</sup>.

Gene enrichment by Metascape

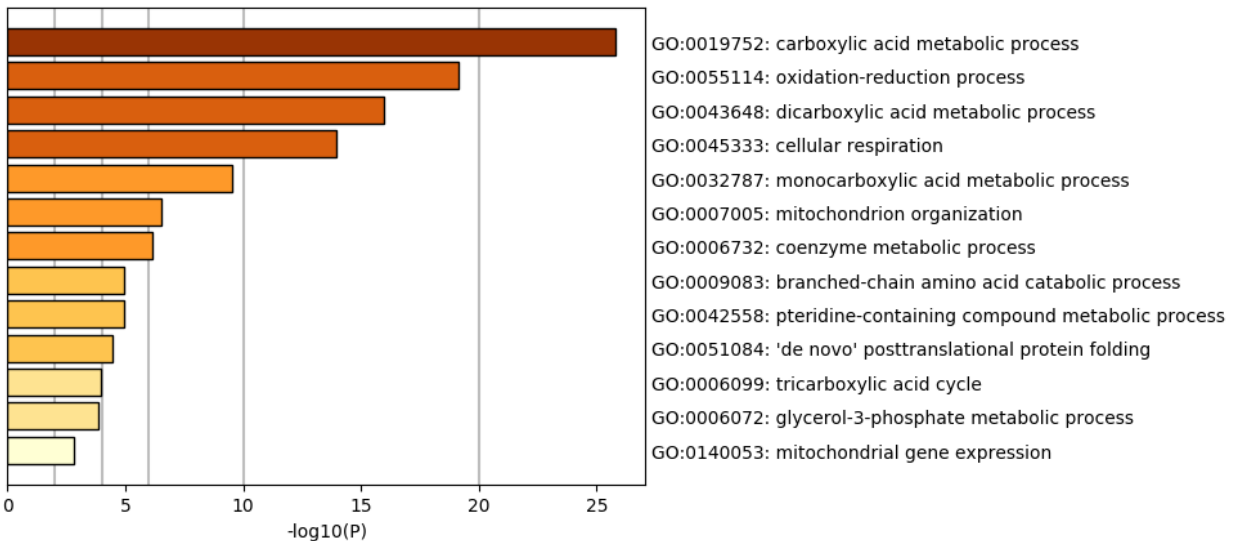

Gene ontology (GO) terms for qNSC-specific mitochondrial genes.

| GO         | Category                | Description                                     | Count | %     | Log10(P) | Log10(q) |
|------------|-------------------------|-------------------------------------------------|-------|-------|----------|----------|
| GO:0019752 | GO Biological Processes | carboxylic acid metabolic process               | 33    | 39.29 | -25.78   | -21.89   |
| GO:0055114 | GO Biological Processes | oxidation-reduction process                     | 31    | 36.90 | -19.16   | -15.87   |
| GO:0043648 | GO Biological Processes | dicarboxylic acid metabolic process             | 12    | 14.29 | -16.00   | -12.80   |
| GO:0045333 | GO Biological Processes | cellular respiration                            | 15    | 17.86 | -13.98   | -10.99   |
| GO:0032787 | GO Biological Processes | monocarboxylic acid metabolic process           | 13    | 15.48 | -9.51    | -6.82    |
| GO:0007005 | GO Biological Processes | mitochondrion organization                      | 11    | 13.10 | -6.52    | -4.09    |
| GO:0006732 | GO Biological Processes | coenzyme metabolic process                      | 9     | 10.71 | -6.13    | -3.75    |
| GO:0009083 | GO Biological Processes | branched-chain amino acid catabolic process     | 3     | 3.57  | -4.95    | -2.74    |
| GO:0042558 | GO Biological Processes | pteridine-containing compound metabolic process | 4     | 4.76  | -4.92    | -2.72    |
| GO:0051084 | GO Biological Processes | 'de novo' posttranslational protein folding     | 4     | 4.76  | -4.47    | -2.36    |
| GO:0006099 | GO Biological Processes | tricarboxylic acid cycle                        | 4     | 4.76  | -3.96    | -1.92    |
| GO:0006072 | GO Biological Processes | glycerol-3-phosphate metabolic process          | 3     | 3.57  | -3.86    | -1.84    |
| GO:0140053 | GO Biological Processes | mitochondrial gene expression                   | 5     | 5.95  | -2.82    | -0.88    |

**Supplementary Table 2** ISC/EB-specific mitochondrial genes.

| No | Gene name | No | Gene name      | No | Gene name | No | Gene name |
|----|-----------|----|----------------|----|-----------|----|-----------|
| 1  | Dhap-at   | 21 | CG5599         | 41 | mRF1      | 61 | mRpL22    |
| 2  | CG8993    | 22 | CG11110        | 42 | ND-49     | 62 | RNaseZ    |
| 3  | CG43998   | 23 | Mthfs          | 43 | CG5037    | 63 | I(2)37Cc  |
| 4  | CG43999   | 24 | nmdyn-D7       | 44 | CG14407   | 64 | Pdp       |
| 5  | CG14043   | 25 | mRpS26         | 45 | Slc25A46a | 65 | mEFG1     |
| 6  | mRpL32    | 26 | mRpL46         | 46 | CG13295   | 66 | mRpL50    |
| 7  | mRpL45    | 27 | GstZ1          | 47 | CG3021    | 67 | mTerf5    |
| 8  | Tim17b    | 28 | CG44194        | 48 | mRRF1     | 68 | Las       |
| 9  | hid       | 29 | AsnRS-m        | 49 | HisRS     | 69 | CG17141   |
| 10 | dnk       | 30 | ND-24          | 50 | CG3107    | 70 | Exd2      |
| 11 | iPLA2-VIA | 31 | Ppox           | 51 | mRpS28    | 71 | MICU1     |
| 12 | Fdx1      | 32 | mRpL51         | 52 | dare      | 72 | Miga      |
| 13 | cav       | 33 | mRpS23         | 53 | mRpL49    | 73 | Mer       |
| 14 | Rae1      | 34 | Sccpdh1        | 54 | TyrRS-m   | 74 | Spag1     |
| 15 | ND-B18    | 35 | GlyRS          | 55 | ScsbetaG  | 75 | ttm2      |
| 16 | CG42376   | 36 | DNApol-gamma35 | 56 | Coq8      | 76 | GLS       |
| 17 | ND-B8     | 37 | CG1307         | 57 | CG10932   | 77 | clu       |
| 18 | CG3156    | 38 | mRpS17         | 58 | Pgam5     | 78 | arg       |
| 19 | Egm       | 39 | ND-13A         | 59 | CG34242   | 79 | shd       |
| 20 | CG3776    | 40 | CG11815        | 60 | CG18528   |    |           |

Annotated list of mitochondrial genes among genes with enriched expression in *Drosophila* ISC/EBs identified in screen by Doupé et al.<sup>2</sup>.

Gene enrichment by Metascape.

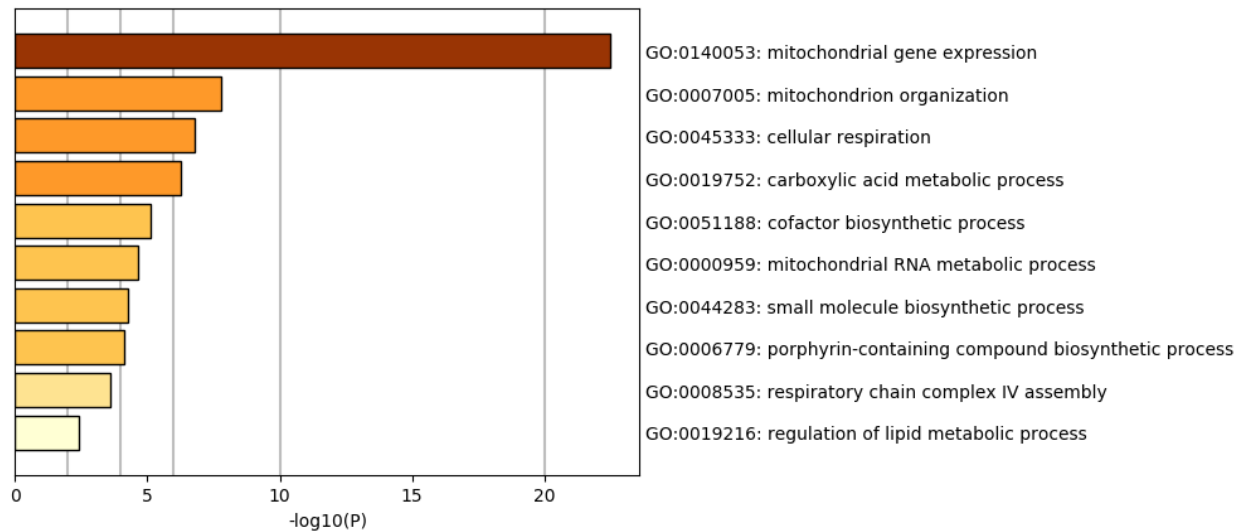

Gene ontology (GO) terms for ISC/EB-specific mitochondrial genes.

| GO         | Category                | Description                                        | Count | %     | Log10(P) | Log10(q) |
|------------|-------------------------|----------------------------------------------------|-------|-------|----------|----------|
| GO:0140053 | GO Biological Processes | mitochondrial gene expression                      | 20    | 25.32 | -22.47   | -18.58   |
| GO:0007005 | GO Biological Processes | mitochondrion organization                         | 12    | 15.19 | -7.80    | -4.39    |
| GO:0045333 | GO Biological Processes | cellular respiration                               | 9     | 11.39 | -6.79    | -3.60    |
| GO:0019752 | GO Biological Processes | carboxylic acid metabolic process                  | 14    | 17.72 | -6.24    | -3.13    |
| GO:0051188 | GO Biological Processes | cofactor biosynthetic process                      | 7     | 8.86  | -5.14    | -2.36    |
| GO:0000959 | GO Biological Processes | mitochondrial RNA metabolic process                | 4     | 5.06  | -4.64    | -1.98    |
| GO:0044283 | GO Biological Processes | small molecule biosynthetic process                | 9     | 11.39 | -4.28    | -1.82    |
| GO:0006779 | GO Biological Processes | porphyrin-containing compound biosynthetic process | 3     | 3.80  | -4.13    | -1.72    |
| GO:0008535 | GO Biological Processes | respiratory chain complex IV assembly              | 3     | 3.80  | -3.62    | -1.41    |
| GO:0019216 | GO Biological Processes | regulation of lipid metabolic process              | 3     | 3.80  | -2.42    | -0.38    |

## Supplementary References

1. Otsuki, L. & Brand, A. H. Cell cycle heterogeneity directs the timing of neural stem cell activation from quiescence. *Science* **360**, 99-102 (2018).
2. Doupé, D. P., Marshall, O. J., Dayton, H., Brand, A. H. & Perrimon, N. *Drosophila* intestinal stem and progenitor cells are major sources and regulators of homeostatic niche signals. *Proc. Natl Acad. Sci. USA* **115**, 12218-12223 (2018).
